# Supplementary material
Source: Springer Nature journal article supplement (https://springermedizin.de/resource/supplementary/12881_2013_1273_MOESM1_ESM.pdf/9452100)

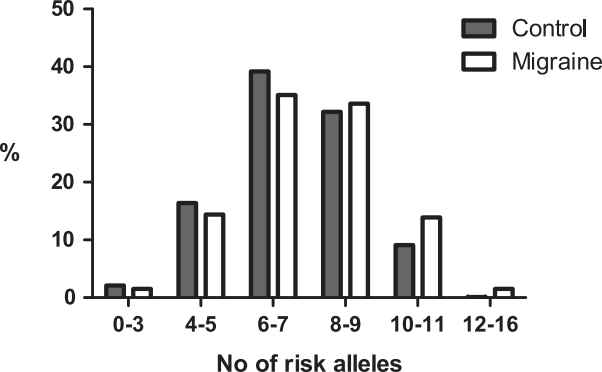

Supplement: MOESM1 [file 9452100]
